# Supplementary material for: miR-218-5p and doxorubicin combination enhances anticancer activity in breast cancer cells through Parkin-dependent mitophagy inhibition
Source: PubMed Central journal article supplement (PMC10957887; doi:10.1038/s41420-024-01914-7), 2024-03-21
Supplement: 41420_2024_1914_MOESM1_ESM.pdf [file 41420_2024_1914_MOESM1_ESM.pdf]

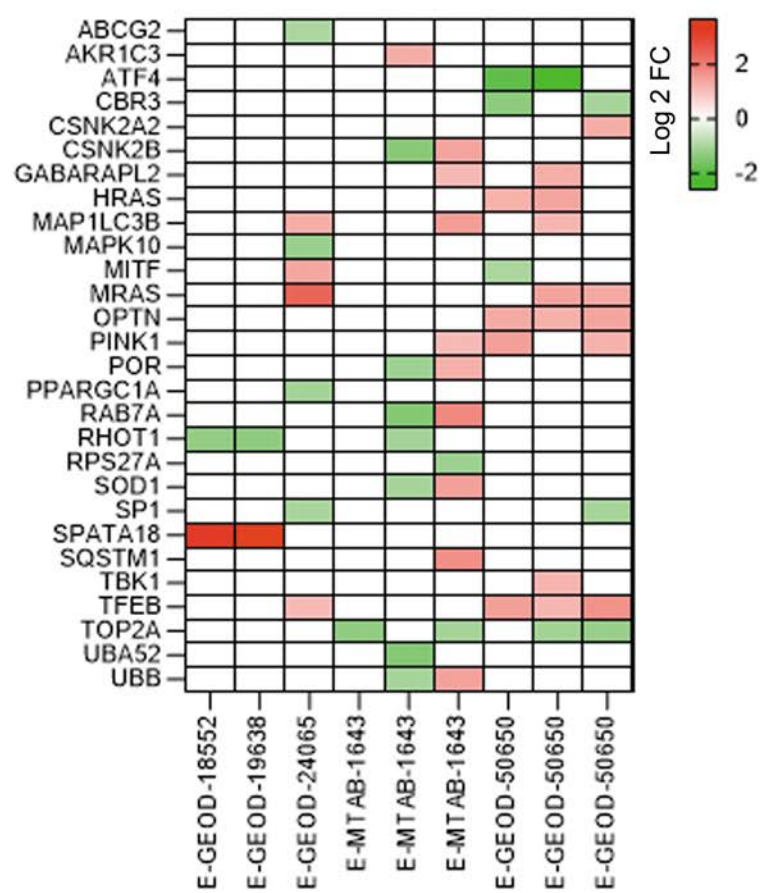

Supplementary figure 1
