# Supplementary material for: miR-218-5p and doxorubicin combination enhances anticancer activity in breast cancer cells through Parkin-dependent mitophagy inhibition
Source: PubMed Central journal article supplement (PMC10957887; doi:10.1038/s41420-024-01914-7), 2024-03-21
Supplement: 41420_2024_1914_MOESM2_ESM.pdf [file 41420_2024_1914_MOESM2_ESM.pdf]

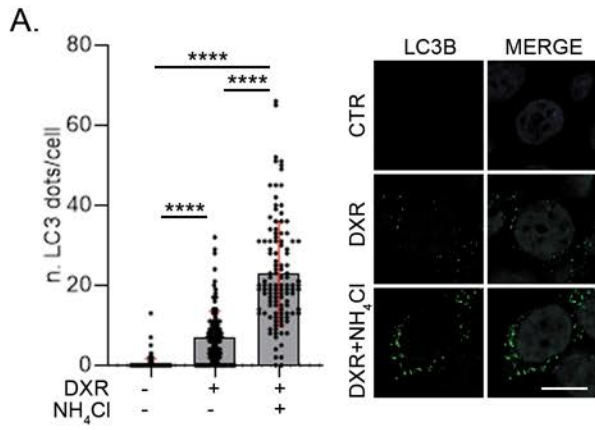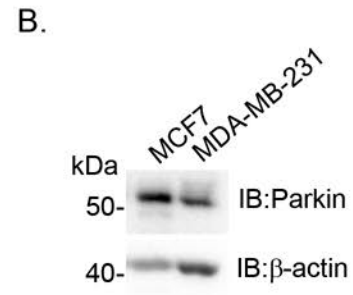

**C.**

|              | Array_ID  | 2082_1_1  | 2082_1_3 | 2082_2_2 | 2082_2_4 | 2083_1_1 | 2083_1_3 | 2083_2_2 | 2083_2_4 |
|--------------|-----------|-----------|----------|----------|----------|----------|----------|----------|----------|
|              | Treatment | CTR       | CTR      | CTR      | CTR      | CTR      | CTR      | CTR      | CTR      |
| ProbeID      | GeneName  |           |          |          |          |          |          |          |          |
| A_23_P136077 | PRKN      | -0.208986 | 0.140807 | 0.311941 | 0.041122 | 0.499264 | 0.923133 | 0.93991  | 0.448927 |
| A_23_P147465 | PRKN      | 2.4847449 | 2.679682 | 2.601949 | 2.776014 | 2.986517 | 2.607652 | 2.864957 | 2.349987 |

  

|              | Array_ID  | 2082_1_2  | 2082_1_4 | 2082_2_1 | 2082_2_3 | 2083_1_2 | 2083_1_4 | 2083_2_1 | 2083_2_3 |
|--------------|-----------|-----------|----------|----------|----------|----------|----------|----------|----------|
|              | Treatment | DXR       | DXR      | DXR      | DXR      | DXR      | DXR      | DXR      | DXR      |
| ProbeID      | GeneName  |           |          |          |          |          |          |          |          |
| A_23_P136077 | PRKN      | 2.1465112 | 1.926889 | 1.971487 | 2.220332 | 2.421862 | 2.172422 | 2.190713 | 2.713822 |
| A_23_P147465 | PRKN      | 4.0972478 | 4.395969 | 4.413657 | 3.968335 | 3.750047 | 4.327018 | 8.928472 | 4.521102 |

**D.**

| ProbeID      | DXR vs CTR |                  |                    |
|--------------|------------|------------------|--------------------|
|              | Log2C      | two-sided t-test | two-sided M-W test |
| A_23_P136077 | 1.8        | 1.85E-07         | 9.40E-04           |
| A_23_P147465 | 2.1        | 8.97E-03         | 9.40E-04           |

**Supplementary figure 2**
